# Supplementary material
Source: PubMed Central journal article supplement (PMC8601106)

## 1 ONLINE REPOSITORY

## 2 METHODS

### 3 Reagents

4 For *in vitro* experiments, chimeric humanized anti-NIP IgE (cIgE) (MCA333S clone JW8/1  
5 Serotec BioRad, **Hercules, CA, USA**) and its hapten-specific antigen NP-OVA/BSA (N-  
6 50051 and N-5050L, Biosearch Technologies, **Petaluma, CA, USA**) were used at different  
7 concentrations (0.1-40  $\mu\text{g/mL}$  and 1-10000  $\text{ng/mL}$  respectively). Omalizumab solutions  
8 (Novartis, **Basel, Switzerland**) were used in different dilutions in Dulbecco's phosphate-  
9 buffered saline (DPBS) (from 40  $\mu\text{g/mL}$  to 1  $\text{ng/mL}$ ). **TAPI-2 solutions (Santa Cruz**  
10 **Biotechnologies, Dallas, TX, USA)** were used at different concentrations (18 and 72  $\mu\text{M}$ ).  
11 Endogenously produced **soluble Fc $\epsilon$ RI (sFc $\epsilon$ RI)** was purified from MelJuso cell supernatants,  
12 analyzed by ELISA and Western Blot, and used at different dilutions (4-10  $\text{ng/mL}$ ).  
13 Recombinant human sFc $\epsilon$ RI (**rsFc $\epsilon$ RI**) was either purchased (MyBioSource, **San Diego, CA,**  
14 **USA**) or provided by the laboratory of Theodore Jardetzky, PhD (Department of Structural  
15 Biology in the School of Medicine at Stanford University) for *in vivo* experiments previously  
16 described (1).

### 17 Patient information

18 Allergic patients or adult healthy volunteers were recruited and blood was collected for  
19 generation of **monocyte-derived dendritic cells (moDCs)** or basophil activation tests. Allergic  
20 patients were defined by  $>0.35$   $\text{kU}_A/\text{L}$  specific IgE levels or  $>3$  mm **wheal size in skin prick**  
21 **test (SPT)**, and any of the following clinical symptoms: allergic asthma, rhinitis,  
22 conjunctivitis, atopic dermatitis, and food allergy. Healthy volunteers had no allergic  
23 symptoms. A total of 10 donors were used in the analysis.

24 All patients included in the study gave written informed consent and were recruited after  
25 approved application from the Ethics Commission, Medical University of Vienna (EK Nr:  
26 1015/2017 and EK Nr: 079/2009).

### 27 Immunoblot analysis

28 Supernatants from cell cultures and **rsFc $\epsilon$ RI** were separated on 12% SDS minigels under  
29 reducing or non-reducing conditions and transferred on nitrocellulose or PVDF membranes by  
30 wet-transfer. Membranes were probed for Fc $\epsilon$ RI $\alpha$  with **mouse IgG2b,K anti-human Fc $\epsilon$ RI $\alpha$ ,**  
31 **clone AER-37 CRA-1 (1:1000) (BioLegend, San Diego, CA, USA)** or 19-1 (2) (1:500),

32 | followed by goat anti-mouse-HRP (Santa Cruz Biotechnologies, Dallas, TX, USA).  
33 | Membranes were developed with an enhanced chemiluminescence (ECL) Western Blotting  
34 | substrate (Thermo Fisher Scientific, Waltham, MA, USA) and detected by a Fusion FX imaging  
35 | platform.

### 36 | **Mice**

37 | 6-8-wk-old BALB/c male and female mice were either purchased from The Jackson  
38 | Laboratory or bred in the animal facility at Boston Children's Hospital (Boston, MA). **IgE**  
39 | **deficient (IgE<sup>-/-</sup>) mice on the *Il4raF709* BALB/c background were described previously (3).**  
40 | Mice were all housed in specific pathogen-free conditions according to the National Institutes  
41 | of Health (NIH) and all experiments were performed with cohoused and littermate controlled  
42 | cohorts that contained both genders. All animal studies were approved by the Boston  
43 | Children's Hospital Institutional Animal Care and Use Committee. For passive sensitization  
44 | model the following reagents were used: murine IgE-anti-DNP (D8406 clone SPE-7, Sigma-  
45 | Aldrich, Merck, St. Louis, MO, USA), DNP-OVA (D-5051, Biosearch Technologies,  
46 | Petaluma, CA, USA) and human rsFcεRI (laboratory of Theodore Jardetzky). For active  
47 | sensitization model the following reagents were used: OVA (A7641, Sigma-Aldrich, Merck,  
48 | St. Louis, MO, USA), Imject® Alum (77161, Thermo Fisher Scientific, Waltham, MA, USA)  
49 | and human rsFcεRI (laboratory of Theodore Jardetzky).

### 50 | **Statistical analyses**

51 | All statistical analyses were performed using Prism 5 and 6 (GraphPad Software), and results  
52 | are shown as mean ± SEM of the indicated number of individual data points or independent  
53 | experiments (at least three). Statistical analysis was performed using Kruskal-Wallis test plus  
54 | Dunn's multiple correction for comparison of two groups, 1way ANOVA test plus Tukey's  
55 | multiple correction for comparison of more than three or more unmatched groups, and 2way  
56 | ANOVA test plus Tukey's or Bonferroni's multiple correction for multiple comparisons  
57 | between three or more groups; *p* values ≤ 0.05 were considered significant.

58

59

60

61

62 **FIGURE LEGENDS**

63

64 **Supplementary Figure 1. TAPI-2 partially blunts sFcεRI release from MelJuso-αγ.** Panel  
65 A shows MFI of bound cIgE (left) and surface FcεRIα (right) on MelJuso-αγ cells. Panel B  
66 shows sFcεRI levels detected by ELISA. Cells were loaded overnight with cIgE (1 μg/mL),  
67 and incubated with TAPI-2 (18-72 μM) for 30 minutes before addition of NP-OVA (50  
68 μg/mL) for 2 hours. Graphs show mean ± SEM of independent experiments (n=3). 1way  
69 ANOVA tests plus Tukey's multiple correction were performed where \*\*\*\*p<0.0001  
70 compared to the second condition.

71

72 **Supplementary Figure 2. Chimeric FcεRI binds cIgE and internalizes after crosslinking.**  
73 Analysis of receptor loading and internalization on mature bone marrow MCs by flow  
74 cytometry. Panel A shows a representative dot plot of MCs, and histogram of cIgE-loading (1  
75 and 10 μg). Panel B shows the MFI of surface bound cIgE (left) and surface FcεRIα (right) on  
76 MCs. Cells were loaded overnight with cIgE (100 or 500 ng/mL) and BSA or NP-BSA (100  
77 ng/mL) was added for 2 hours. Graphs show mean ± SEM of independent experiments (n=2).  
78 1way ANOVA tests plus Tukey's multiple correction was performed where \*\*\*p<0.001  
79 compared to the first condition.

80

81 **Supplementary Figure 3. Endogenously produced and recombinant sFcεRI inhibit cIgE**  
82 **binding and crosslinking.** Detection of bound cIgE (left) and surface FcεRIα (right) on  
83 MelJuso-ØØ/αγ/αβγ cells. Endogenous sFcεRI was harvested and purified from MelJuso cell  
84 cultures. Cells were loaded overnight with cIgE (1 μg/mL) in presence or absence of  
85 endogenous or recombinant (2.5-25 nM) sFcεRI. NP-OVA (50 μg/mL) was added for 3-5  
86 hours. Graphs show mean ± SEM of independent experiments (n=3-6). 1way ANOVA tests  
87 plus Tukey's multiple correction were performed where \*p<0.05, \*\*p<0.01, and \*\*\*p<0.001  
88 compared to the second condition.

89

90 **Supplementary Figure 4. sFcεRI blocks cell surface cIgE binding.** Detection of bound  
91 cIgE (left) and FcεRIα (right) on MelJuso-αβγ cells by flow cytometry (sFcεRI (25 nM) and  
92 omalizumab (0.27 μM)). Graphs show mean ± SEM. Individual points represent means of  
93 independent experiments (n=3). 1way ANOVA tests plus Tukey's multiple correction were  
94 performed where \*p<0.05, \*\*p<0.01, and \*\*\*p<0.001, compared to cells loaded with cIgE.

95

96 | **Supplementary Figure 5. Gating strategy for human basophils.** Detection of surface  
97 CCR3 and CD63 on basophils by flow cytometry. Representative dot plot of PBMCs isolated  
98 from healthy or allergic volunteers (n=3) gated as CCR3+/SSClow. CD63+ gate was adjusted  
99 according to donor's background. B: background.

100

101 | **Supplementary Figure 6. sFcεRI prevents systemic anaphylaxis and improves recovery**  
102 **in actively-sensitized mice.** Detection of recombinant sFcεRI and in MCs cultures by  
103 Western Blot (A) and analysis of core body temperature from systemically sensitized mice (B,  
104 C). Panel A shows a representative Western Blot analysis of sFcεRI from BMMCs cultures or  
105 recombinantly produced. Panel B shows temperature drops at the 45 min time point. Graphs  
106 shown mean ± SEM where individual points represent each mouse. Graphs shown mean ±  
107 SEM of each group (n=3-4 mice per group). 1way ANOVA tests plus Tukey's multiple  
108 correction were performed where \*p<0.05 and \*\*\*\*p<0.0001.

109

- 110 1. Garman SC, Kinet JP, Jardetzky TS. The crystal structure of the human high-affinity  
111 IgE receptor (Fc epsilon RI alpha). *Annu Rev Immunol.* 1999;17:973-6.
- 112 2. Fiebiger E, Tortorella D, Jouvin MH, Kinet JP, Ploegh HL. Cotranslational  
113 endoplasmic reticulum assembly of FcepsilonRI controls the formation of functional IgE-  
114 binding receptors. *J Exp Med.* 2005;201(2):267-77.
- 115 3. Oettgen HC, Martin TR, Wynshaw-Boris A, Deng C, Drazen JM, Leder P. Active  
116 anaphylaxis in IgE-deficient mice. *Nature.* 1994;370(6488):367-70.

117

Supplementary Figure 1

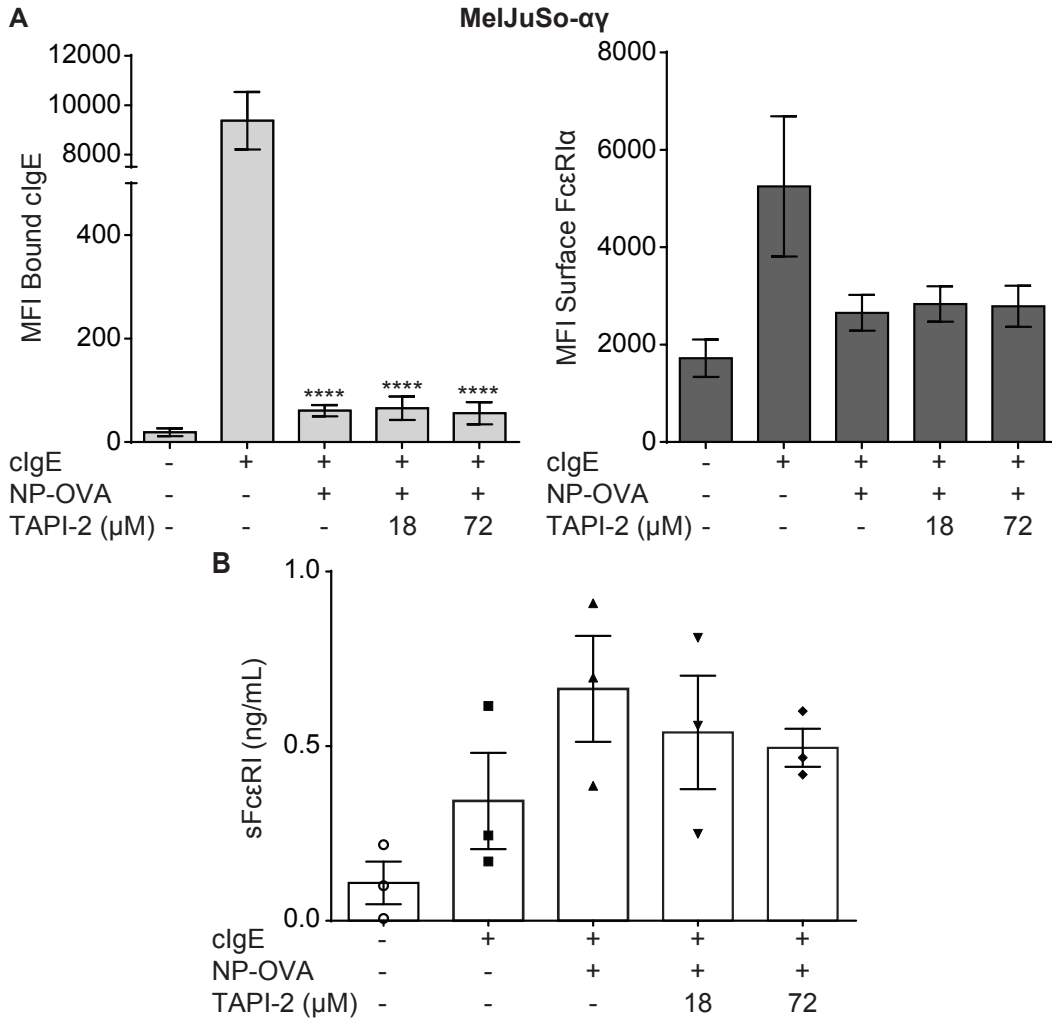

**Supplementary Figure 2**

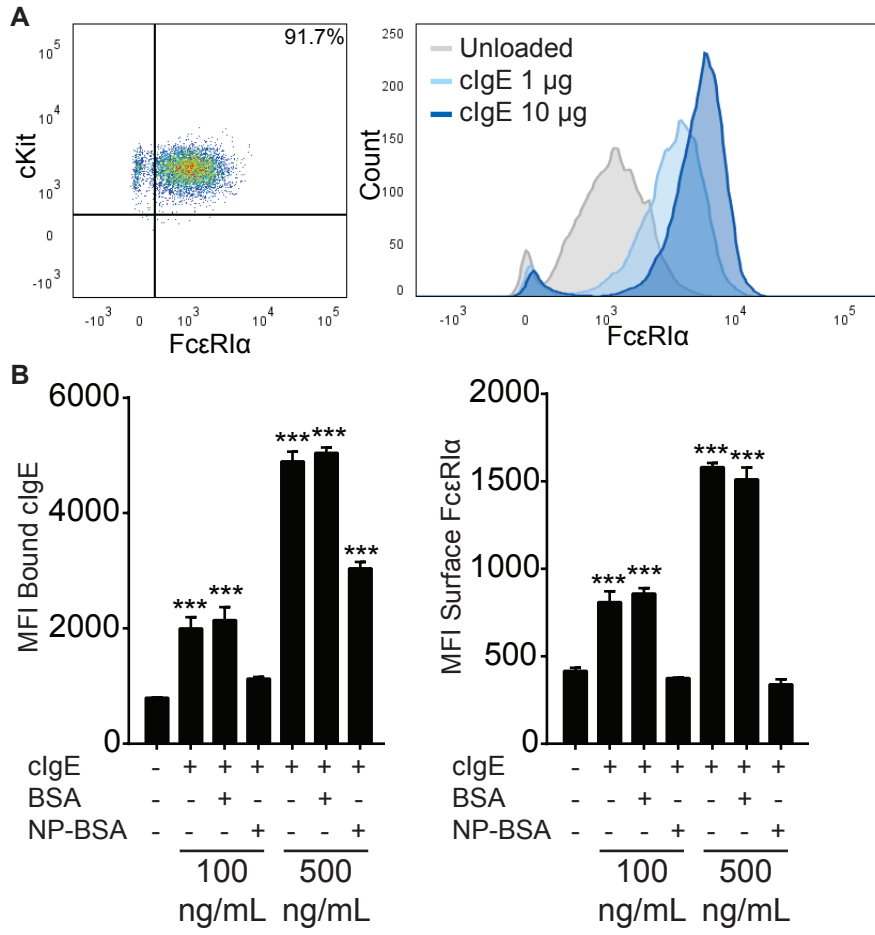

**Supplementary Figure 3**

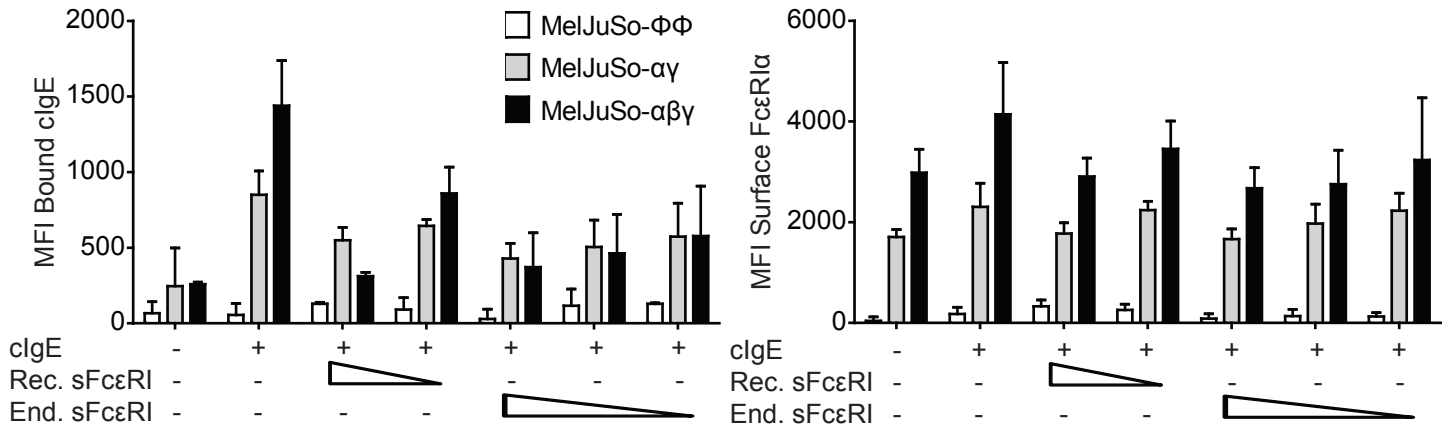

Supplementary Figure 4

MeIJuSo- $\alpha$

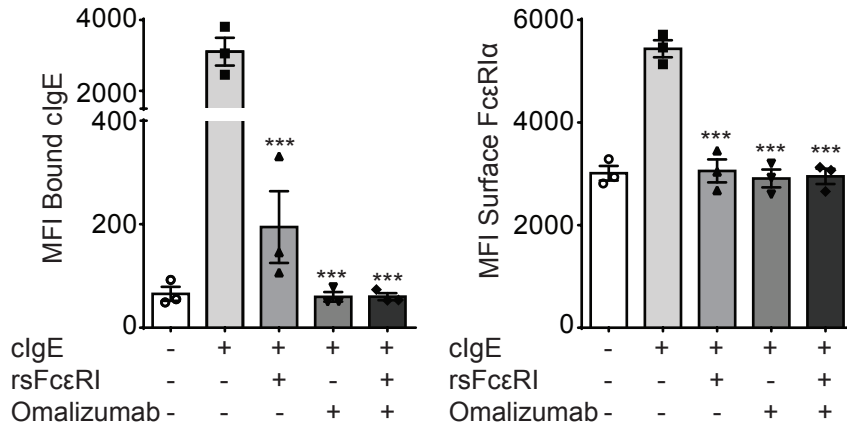



Supplementary Figure 5

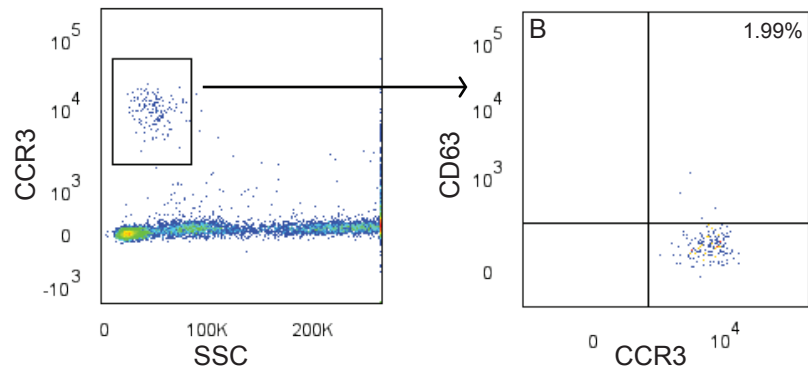

### Supplementary Figure 6

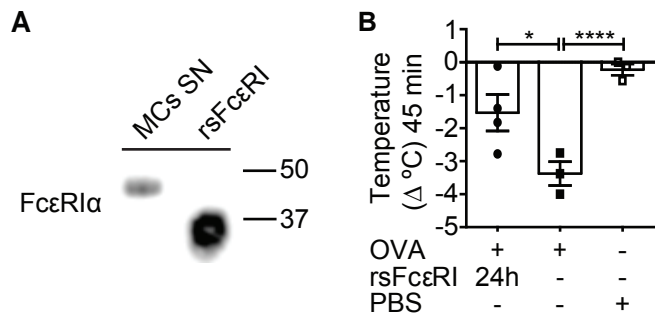

Supplement: NIHMS1754378-supplement-Supplementary_Material.pdf [file NIHMS1754378-supplement-Supplementary_Material.pdf]
